# Supplementary material
Source: PubMed Central journal article supplement (PMC3406144)
Supplement: AEM.00855-12_zam999103516so1.pdf [file AEM.00855-12_zam999103516so1.pdf]

Table S. Oligonucleotides used in this study

| Primer    | Sequence <sup>a</sup> (5' - 3')                                         |
|-----------|-------------------------------------------------------------------------|
| araSF1    | GCG <u>CATGC</u> TTTTTTTTAGAAAAACATCCAATATGTAAAC                        |
| araSF2    | GTC <u>GATGC</u> ATGTTAAACAAGTTAGG                                      |
| araSR     | TTTTTTT <u>CATATG</u> CTCGGGTACTTTTATGACCTAAC                           |
| araSSDR   | GTGATGCATATGAGCT <b><u>TCACCTC</u></b> ATTCTCGGGTACTTTTATG <sup>b</sup> |
| araSR_TL1 | GTGATGCATATGAGATATCGCCTTGTATAATC                                        |
| araSR_TL2 | GTGATGCATATGTAATCTACGCCTAGACATAT                                        |
| albaF     | CTGG <u>CATGC</u> TACAAAAGTATTATCATGTA                                  |
| albaR     | GACATGCATATGCTCTCACGAGTCATAAGTGG                                        |
| Sso7dF    | GTCG <u>CATGCC</u> ATATTATAGTTGGATCTGG                                  |
| Sso7dR    | TCGACGCATATGCTTCAAGTTATCC                                               |
| lacSF     | TGCCAGC <u>CATATG</u> IACTCATTTCCAAATAGCTTT                             |
| lacSR     | GTCG <u>TCGAC</u> GTGCCTTAATGGCTTTACTGG                                 |
| lacSF2    | GGTCGCTAGCTACTCATTTCCAAATAGCTTT                                         |
| lacSR*    | GTCG <u>TCGACT</u> TAGTG CCTTAATGGCTTTAC                                |
| MCS1      | TTTTTTT <u>CATATG</u> CATCAT <b><u>CACCATCATCATAGTAGTGGTTTAGT</u></b>   |
| MCS2      | <b><u>CATCGATT</u></b> TCGCGATCCCCTTGGTACTAAACCACTACTATGATGATGGTGA      |
| MCS3      | <b><u>AAGGGGATCGCGAATCGATGCTAGCTACGCGTCTCCGGATGTACAAAGGC</u></b>        |
| MCS4      | <b><u>ATCAGCGTCGACCTTATCGTCATCATCAGGCCTTTGTACATCCGGAGACG</u></b>        |
| MCS5      | <b><u>GACGATAAGGTCGACGCTGATCAAGCGGCCGCACACCATCATCATCACCA</u></b>        |
| MCS6      | <b><u>AA<u>CCCGGG</u>AAAAAAAAAGATTTTGCTTAGTGGTGATGATGATGGTGTGCG</u></b> |

<sup>a</sup> Restriction sites are underlined and bold-phased letters highlight the complementary sequences presented in the different MCS oligonucleotides.

<sup>b</sup> the 14-nt sequence incorporated into araS promoter is highlighted in red with the SD motif underlined
